# Supplementary material for: Antiurease screening of alkyl chain-linked thiourea derivatives: in vitro biological activities, molecular docking, and dynamic simulations studies
Source: Royal Society of Chemistry journal article supplement (doi:10.1039/d1ra08694d), 2022-01-01
Supplement: d1ra08694d1.pdf [file d1ra08694d1.pdf]

## Supplementary Data

### Antiurease screening of alkyl chain linked thiourea derivatives: In vitro biological activities, molecular docking and dynamic simulations studies

Sana Yaqoob <sup>a</sup>, Abdul Hameed <sup>a,b\*</sup>, Mahmood Ahmed <sup>c,\*\*</sup>, Muhammad Imran <sup>d</sup>, Muhammad Abdul Qadir <sup>e</sup>, Mahwish Ramzan <sup>f</sup>, Numan Yousaf <sup>f</sup>, Jamshed Iqbal <sup>g</sup>, Muhammad Muddassar <sup>f\*\*\*</sup>

<sup>a</sup>H. E. J. Research Institute of Chemistry, International Center for Chemical and Biological Sciences, University of Karachi, Karachi-Pakistan

<sup>b</sup>Department of Chemistry, University of Sahiwal, Sahiwal-Pakistan

<sup>c</sup>Division of Science and Technology, University of Education, College Road, Lahore-Pakistan

<sup>d</sup>KAM-School of Life Sciences, FC College (A Chartered University) Lahore- Pakistan

<sup>e</sup>School of Chemistry, University of the Punjab, Lahore- Pakistan

<sup>f</sup>Department of Biosciences, COMSATS University Islamabad, Park Road, Islamabad- Pakistan

<sup>g</sup>Center for Advanced Drug Research, COMSATS Institute of Information Technology, Abbottabad 22060, Pakistan

To whom correspondence should be addressed

---

Mahmood Ahmed, PhD

[mahmoodresearchscholar@gmail.com](mailto:mahmoodresearchscholar@gmail.com)

Muhammad Muddassar, PhD

[mmuddassar@comsats.edu.pk](mailto:mmuddassar@comsats.edu.pk)

Abdul Hameed, PhD

[abdul\\_hameed8@hotmail.com](mailto:abdul_hameed8@hotmail.com)

---12.439  
---11.581

731  
708  
571  
564  
351  
344  
329  
322

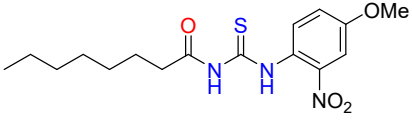

SANA/DR, ABDUL HAMEED/SI-1-12//  
ICCBS, U.O. K/1H

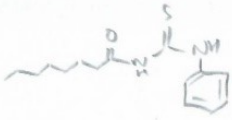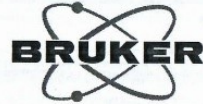

Current Data Parameters  
NAME 5678  
EXPNO 5  
PROCNO 1

F2 - Acquisition Parameters  
Date\_ 20180226  
Time 6.42  
INSTRUM spect  
PROBHD 5 mm DUL 13C-1  
PULPROG zg30  
TD 32768  
SOLVENT DMSO  
NS 64  
DS 0  
SWH 8012.820 Hz  
FIDRES 0.244532 Hz  
AQ 2.0447233 sec  
RG 322.5  
DW 62.400 usec  
DE 6.50 usec  
TE 300.0 K  
D1 2.0000000 sec  
TDO 1

=====  
CHANNEL f1  
NUC1 1H  
P1 8.40 usec  
PL1 0 dB  
SFO1 400.1332010 MHz

F2 - Processing parameters  
SI 16384  
SP 400.1300065 MHz  
WDW EM  
SSB 0  
LB 0.30 Hz  
GB 0  
PC 1.00

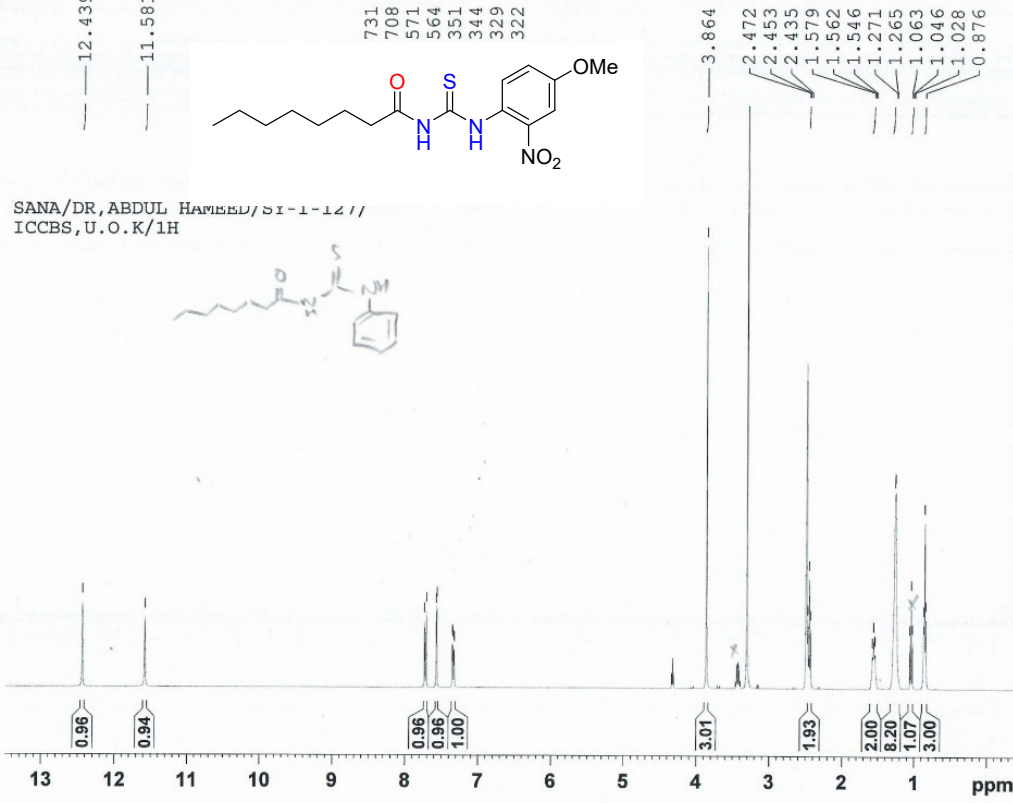

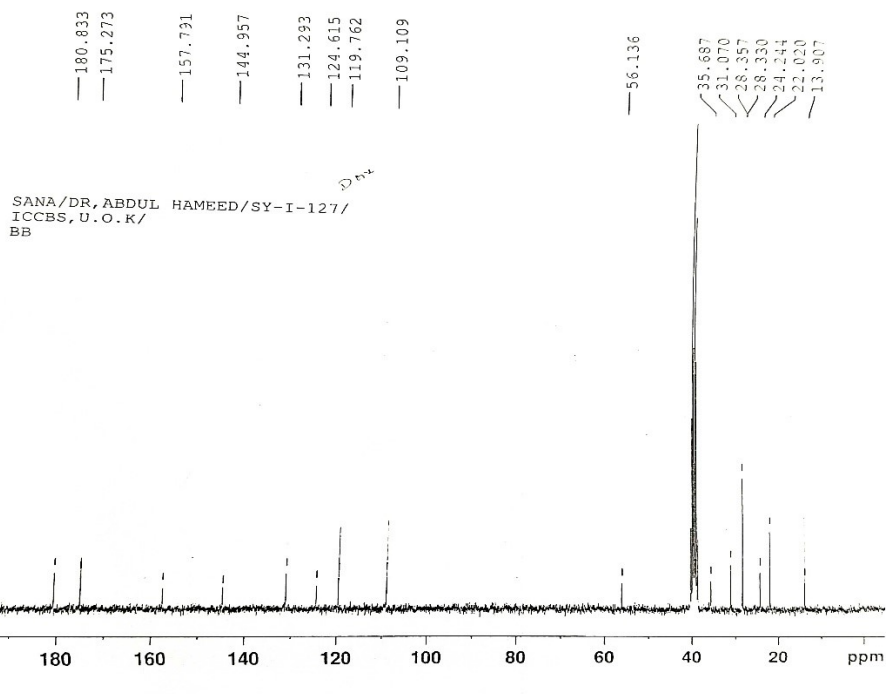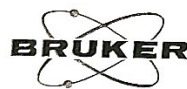

Support Data Parameters  
NAME MAY 14 19-57-127 C12  
EXNO 0  
PROCNO 1

PS - Acquisition Parameters  
Date\_ 20190512  
Time 21:36  
INSTRUM spect  
PROBHD 5 mm BBO 5Q-1H  
PULPROG zgpg  
TE 300K  
SOLVENT DMF  
NS 1519  
DS 4  
SWH 1723.846 Hz  
FIDRES 0.350197 Hz  
AQ 0.7037583 sec  
RG 1024  
EQ 16.12  
DQ 47.703 usec  
DE 6.30 usec  
TE 300.2 K  
D1 1.00000000 sec  
D11 0.00000000 sec  
TD0 14

----- CHANNEL f1 -----  
NUC1 13C  
P1 18.00 usec  
PL1 0 dB  
PL1W 18.8849325 W  
SFO1 101.626125 MHz

----- CHANNEL f2 -----  
CPDPRG2 waltz16  
NUC2 1H  
FPCP2 30.00 usec  
PL2 0 dB  
PL12 16.12 dB  
PL13 17.00 dB  
PL1W 11.1822445 W  
PL1XW 0.1781132 W  
PL1YW 0.1782212 W  
SFO2 500.1315007 MHz

PS - Processing parameters  
SI 16384  
SF 75.4677350 MHz  
WDW EM  
SSB 0 1.00 Hz  
LB 0 1.00

Fig-S1: <sup>1</sup>H- and <sup>13</sup>C-NMR Spectra of (3a)

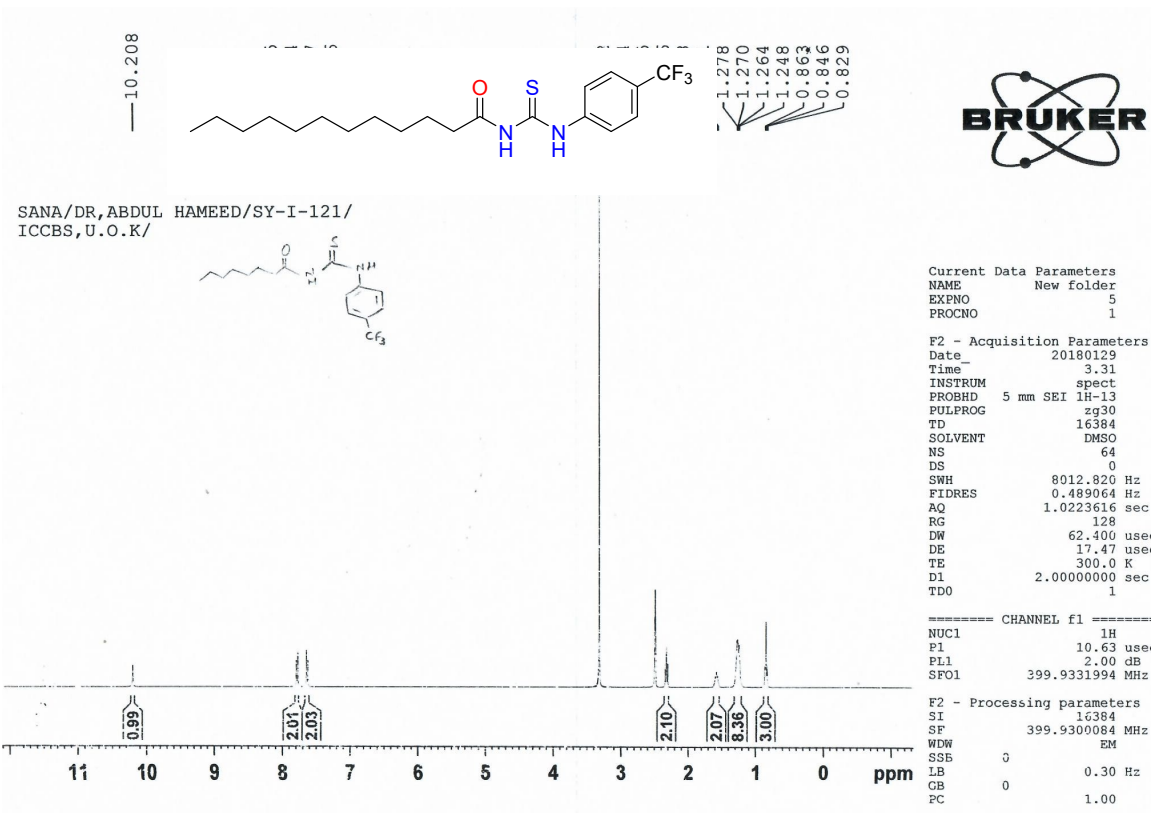

Fig-S2: <sup>1</sup>H-NMR Spectrum of (3b)



—12.411

—11.586

ANA/DR, ABDUL HAMEI  
CCBS, U.O.K/1H

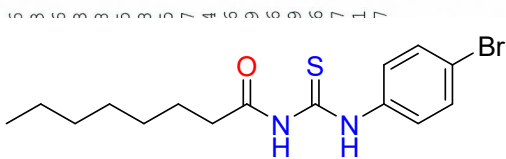

2.465  
2.447  
1.579  
1.562  
1.545  
1.268  
1.262  
0.874

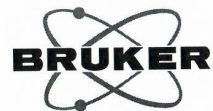

Current Data Parameters  
NAME New folder  
EXPNO 4  
PROCNO 1

F2 - Acquisition Parameters  
Date\_ 20180209  
Time\_ 3.12  
INSTRUM spect  
PROBHD 5 mm DUL 13C-1  
PULPROG zg30  
TD 32768  
SOLVENT DMSO  
NS 32  
DS 0  
SWH 9012.820 Hz  
FIDRES 0.244532 Hz  
AQ 2.0447233 sec  
RG 322.5  
DW 62.400 usec  
DE 6.50 usec  
TE 300.0 K  
D1 2.0000000 sec  
TDO 1

===== CHANNEL f1 =====  
NUC1 1H  
P1 8.40 usec  
PL1 0 dB  
SFO1 400.1332010 MHz

F2 - Processing parameters  
SI 16384  
SF 400.130065 MHz  
WDW EM  
SSB 0  
LB 0.30 Hz  
GB 0  
PC 1.00

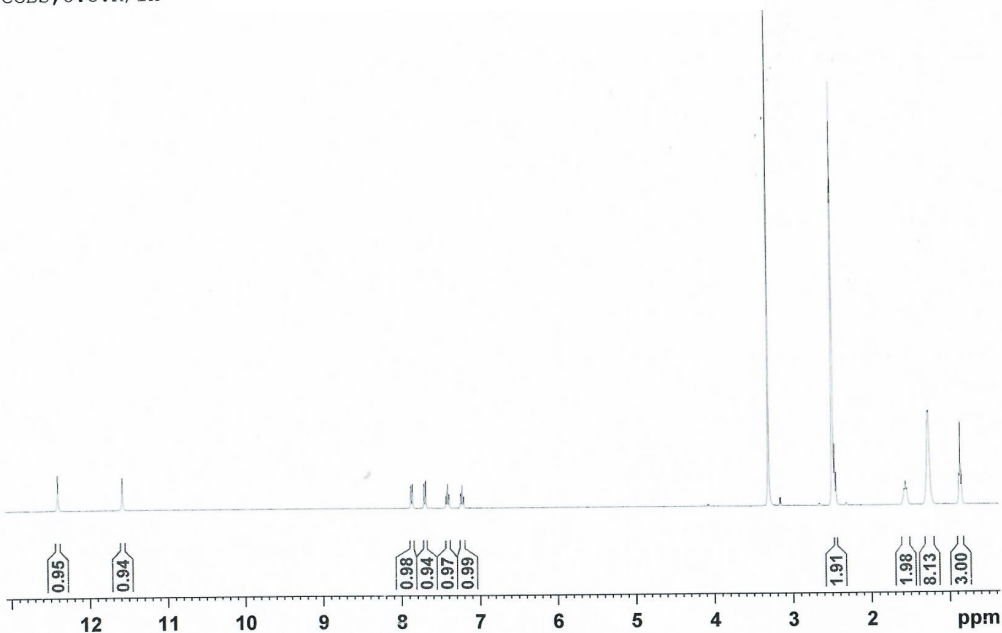

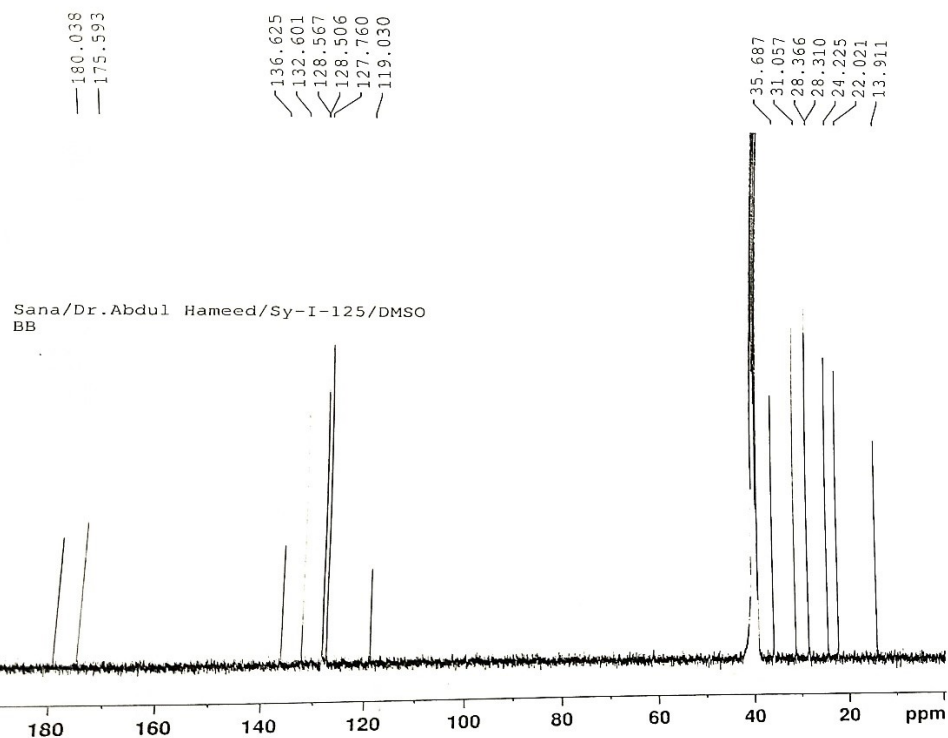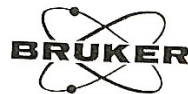

Current Data Parameters  
 NAME aug20-13  
 EXPNO 2  
 PROCNO 1

F2 - Acquisition Parameters  
 Date\_ 20130320  
 Time 17.53 h  
 INSTRUM spect  
 PROBD 23756\_0202 (PH)  
 PULPROG zgpg  
 TD 32768  
 SOLVENT DMSO  
 NS 20400  
 DS 4  
 SWH 24028.461 Hz  
 FIDRES 1.467191 Hz  
 AQ 0.6815744 sec  
 RG 196.51  
 DW 20.800 usec  
 DE 6.50 usec  
 TE 299.6 K  
 D1 2.00000000 sec  
 D11 0.03000000 sec  
 TDO 20  
 SFO1 100.6605511 MHz  
 NUC1 13C  
 P1 10.00 usec  
 PLW1 56.16659982 W  
 SFO2 400.2816011 MHz  
 NUC2 1H  
 CPDPRG[2] waltz16  
 PCPD2 90.00 usec  
 PLW2 8.31400013 W  
 PLW12 0.23388711 W  
 PLW13 0.11722420 W

F2 - Processing parameters  
 SI 32768  
 SF 100.6505364 MHz  
 WDW EM  
 SSB 0  
 LB 1.00 Hz  
 GB 0  
 PC 1.40

Fig-3: <sup>1</sup>H- and <sup>13</sup>C-NMR Spectra of (3c)

SANA/DR, ABDUL HA  
ICCBS.U.O.K/

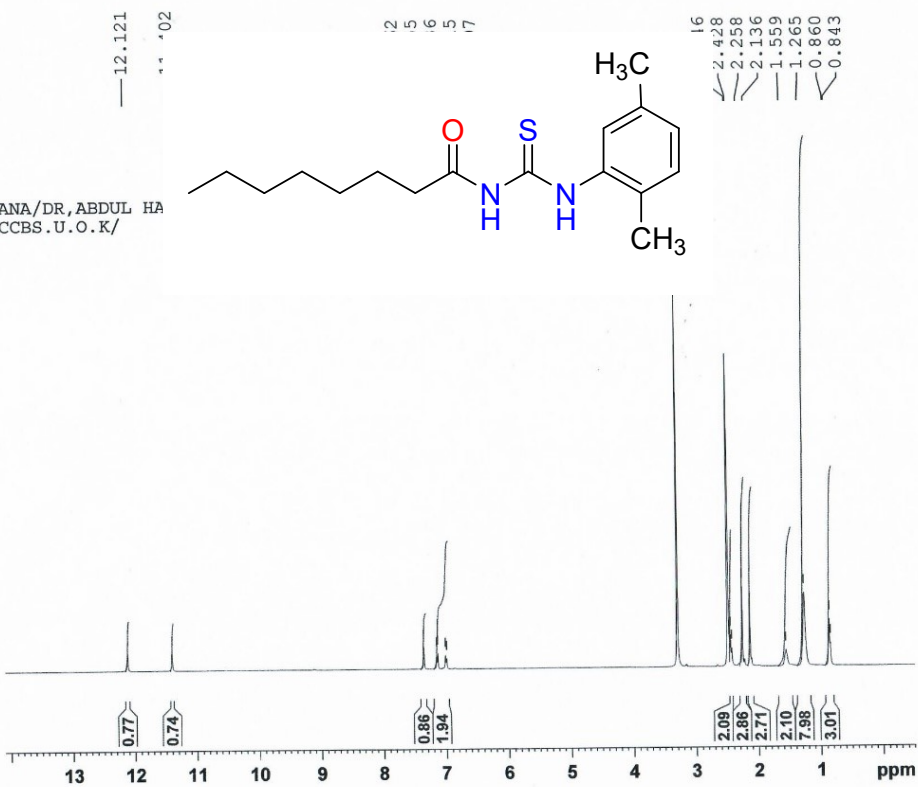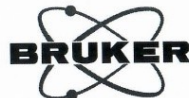

Current Data Parameters  
NAME JAN19-18  
EXPNO 6  
PROCNO 1

F2 - Acquisition Parameters  
Date\_ 20180119  
Time\_ 18.46  
INSTRUM spect  
PROBHD 5 mm DUL 13C-1  
PULPROG zg30  
TD 32768  
SOLVENT DMSO  
NS 32  
DS 0  
SWH 8012.820 Hz  
FIDRES 0.244532 Hz  
AQ 2.0447233 sec  
RG 456.1  
DW 62.400 usec  
DE 6.50 usec  
TE 300.0 K  
DL 2.0000000 sec  
TDO 1

----- CHANNEL f1 -----  
NUC1 1H  
P1 8.40 usec  
PL1 0 dB  
SFO1 400.1332010 MHz

F2 - Processing parameters  
SI 16384  
SF 400.130065 MHz  
WDW EM  
SSB 0  
LB 0.30 Hz  
GB 0  
PC 1.00



Sana / Dr. Abdul Hameed / SY-I-117 / DMSO  
BB

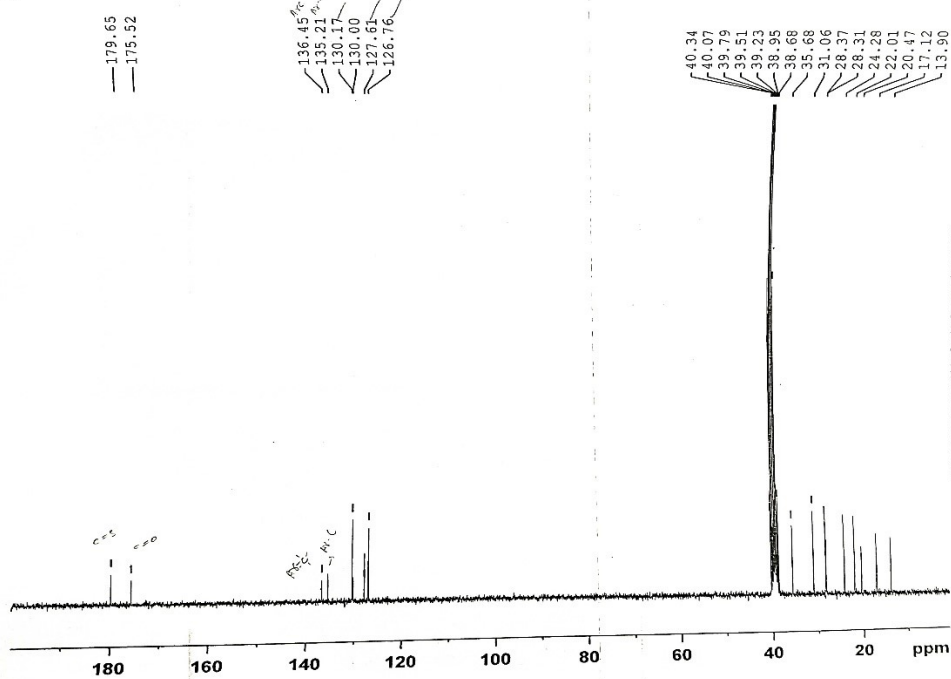

AVANCE NEO  
300 MHz  
Lab # 108

Current Data Parameters  
NAME Aug20-18  
EXPNO 1  
PROCNO 1

F2 - Acquisition Parameter  
Date\_ 20180821  
Time\_ 3.33 h  
INSTRUM Avance Neo 300  
PROBHD Z8284\_0948 (PH)  
PULPROG zgpg  
TD 32768  
SOLVENT DMSO  
NS 16384  
DS 8  
SWH 17857.143 Hz  
FIDRES 1.089913 Hz  
AQ 0.9175040 sec  
RG 4.6975  
DW 28.000 usec  
DE 12.00 usec  
TE 300.0 K  
D1 1.50000000 sec  
D11 0.03000000 sec  
TDO 16  
SEO1 75.4764278 MHz  
NUC1 13C  
P1 10.00 usec  
PLW1 53.07400131 W  
SEO2 300.1312005 MHz  
NUC2 1H  
CPDPRG2 waltz65  
PCPD2 90.00 usec  
PLW2 8.72920036 W  
PLW12 0.24247989 W  
PLW13 0.121196000 W

F2 - Processing parameters  
SI 16384  
SF 75.4677860 MHz  
WDW EM  
SSB 0 1.00 Hz  
LB 0  
GB 0  
PC 1.20

Fig-S4: <sup>1</sup>H- and <sup>13</sup>C-NMR Spectra of (3d)

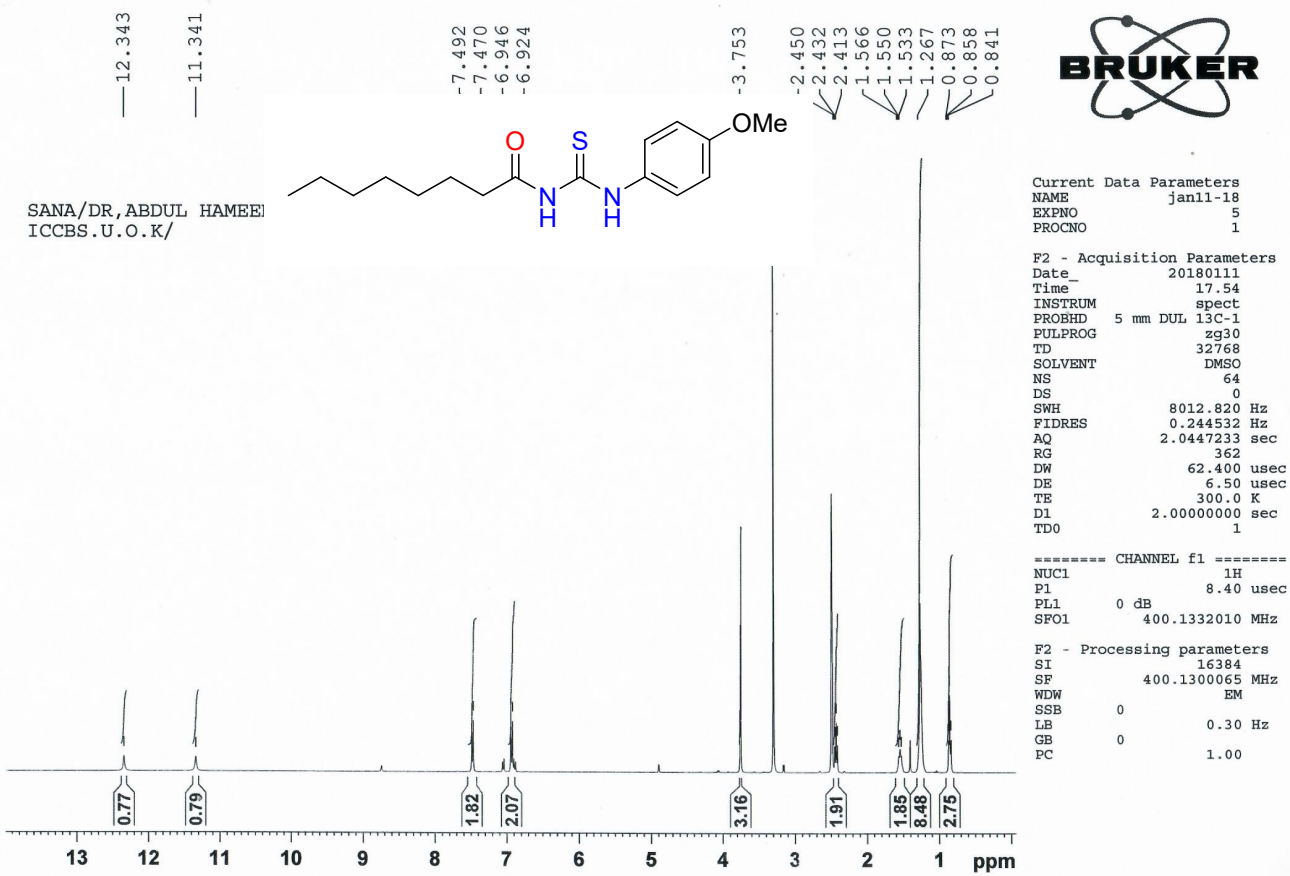

Fig-S5: <sup>1</sup>H-Spectrum of (3e)

SANA/DR, ABDUL HAM  
ICCBS . U . O . K /

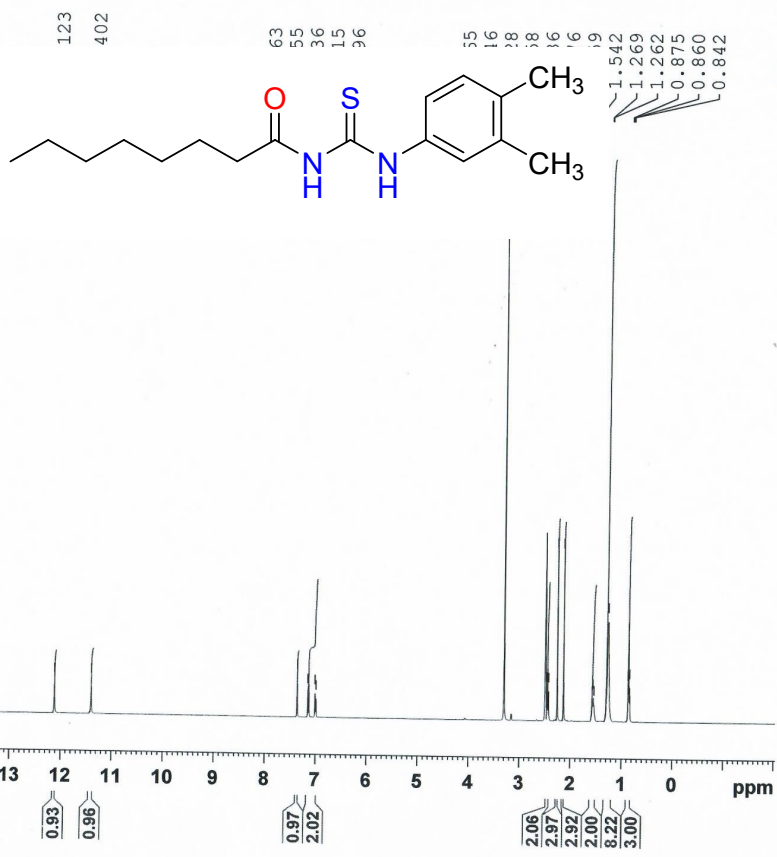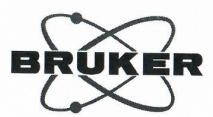

Current Data Parameters  
NAME jan11-18  
EXPNO 4  
PROCNO 1

F2 - Acquisition Parameters  
Date\_ 20180111  
Time 16.59  
INSTRUM spect  
PROBHD 5 mm DUL 13C-1  
PULPROG zg30  
TD 32768  
SOLVENT DMSO  
NS 32  
DS 0  
SWH 8012.820 Hz  
FIDRES 0.244532 Hz  
AQ 2.0447233 sec  
RG 362  
DW 62.400 usec  
DE 6.50 usec  
TE 300.0 K  
D1 2.00000000 sec  
TDO 1

----- CHANNEL f1 -----  
NUC1 1H  
P1 8.40 usec  
PL1 0 dB  
SFO1 400.1332010 MHz

F2 - Processing parameters  
SI 16384  
SF 400.130065 MHz  
WDW EM  
SSB 0  
LB 0.30 Hz  
GB 0  
PC 1.00

/ Dr. Abdul Hameed / SY-I-109 / DMSO

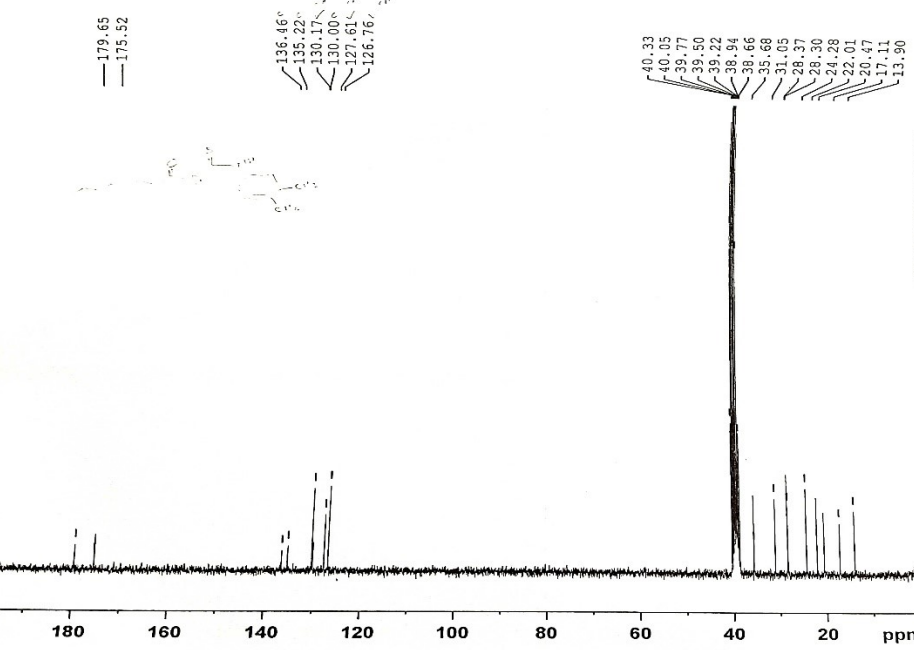

AVANCE NEO  
300 MHz  
Lab # 108

Current Data Parameters  
NAME Aug10-18  
EXPNO 1  
PROCNO 1

F2 - Acquisition Parameters  
Date\_ 20180811  
Time 0.27 h  
INSTRUM Avance Neo 300  
PROBHD Z8284.0948 (PH)  
PULPROG zgpg  
TD 32768  
SOLVENT DMSO  
NS 18432  
DS 8  
SWH 17857.143 Hz  
FIDRES 1.089913 Hz  
AQ 0.915948 sec  
RG 4.6875  
DE 28.000 usec  
TE 32.00 usec  
TE 300.0 K  
D1 1.50000000 sec  
D11 0.03000000 sec  
TDO 18  
SFO1 75.4764278 MHz  
NUC1 13C  
P1 10.00 usec  
PLW1 53.07400131 W  
SFO2 300.1312005 MHz  
NUC2 1H  
CPDPRG[2] waltz65  
PCPD2 90.00 usec  
PLW2 8.72920036 W  
PLW12 0.24247999 W  
PLW13 0.12196000 W

F2 - Processing parameters  
SI 16384  
SF 75.4677860 MHz  
WDW EM  
SSB 0  
LB 1.00 Hz  
GB 0  
PC 1.20

Fig-S6: <sup>1</sup>H- and <sup>13</sup>C-NMR Spectra of (3f)

SANA/D  
ICCBS.

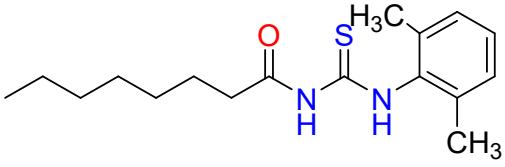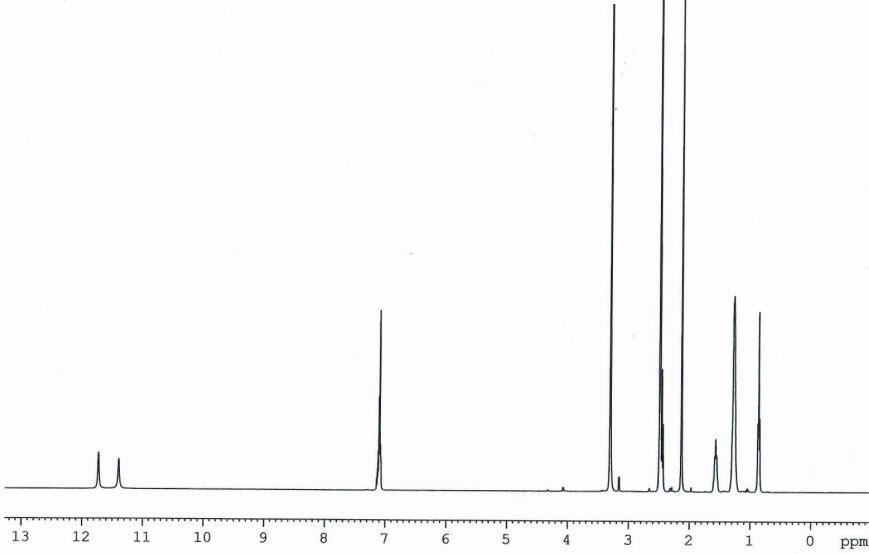

AVANCE 400  
LAB NO 117

NAME Dec22-17  
EXPNO 4  
PROCNO 1  
Date\_ 20171222  
Time 12.25  
INSTRUM spect  
PROBHD 5 mm DUL 13C-1  
PULPROG zg30  
TD 32768  
SOLVENT DMSO  
NS 32  
DS 0  
SWH 8012.820 Hz  
FIDRES 0.244532 Hz  
AQ 2.0447731 sec  
RG 362  
DW 62.400 usec  
DE 6.50 usec  
TE 300.0 K  
D1 2.0000000 sec  
TD0 1

===== CHANNEL f1 =====  
NUC1 1H  
P1 8.40 usec  
PL1 0.00 dB  
SFO1 400.1332010 MHz  
SI 16384  
SF 400.1300065 MHz  
WDW EM  
SSB 0  
LB 0.30 Hz  
GB 0  
EC 1.00

Sana / Dr. Abdul Hameed / SY-I-107 / DMSO  
BB

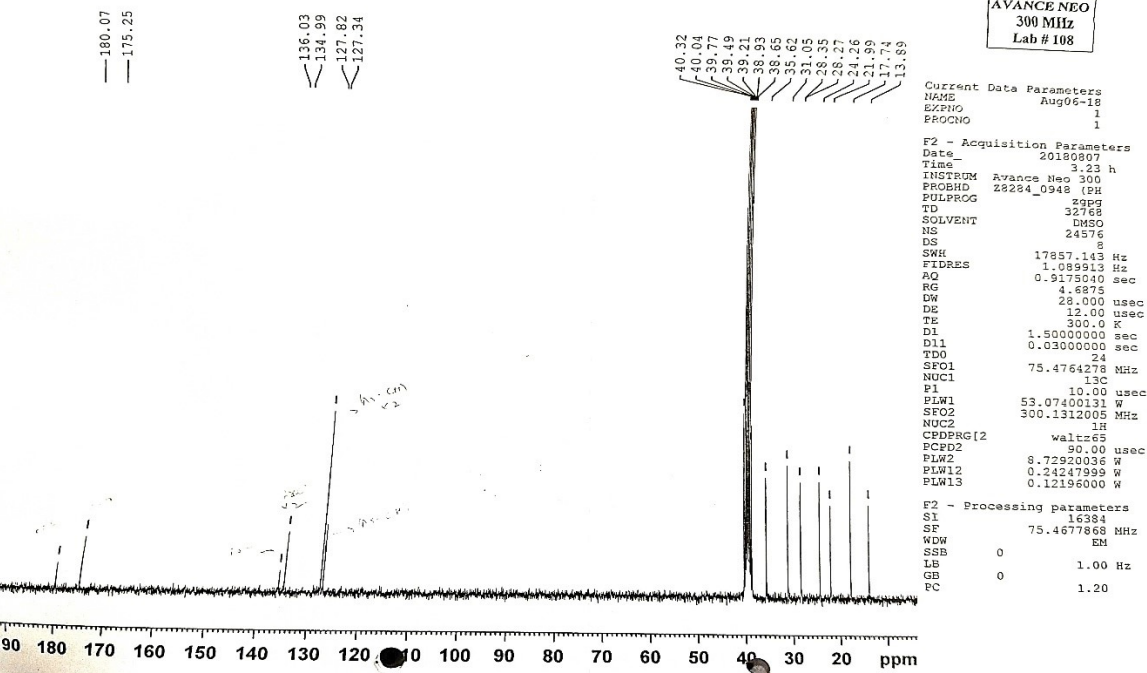

Fig-S7: <sup>1</sup>H- and <sup>13</sup>C-NMR Spectra of (3g)

SANA/DR, ABDUL H  
ICCBS.U.O.K/

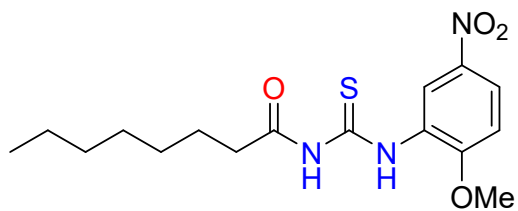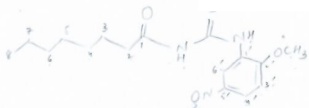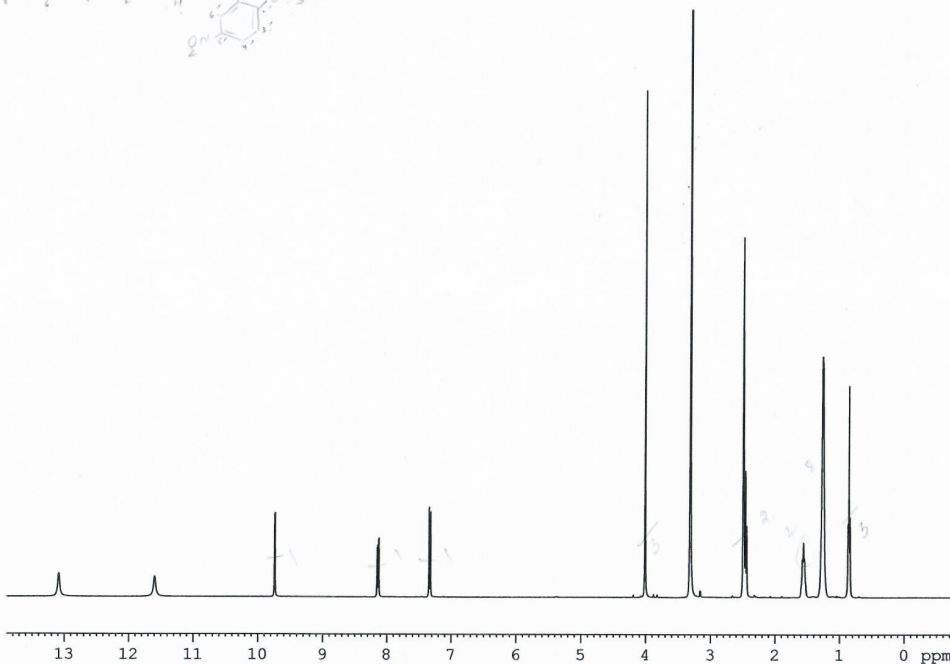

AVANCE 400  
LAB NO 117

NAME Dec14-17  
EXPNO 1  
PROCNO 1  
Date\_ 20171214  
Time 11.52  
INSTRUM spect  
PROBHD 5 mm DUL 13C-1  
PULPROG zg30  
TD 32768  
SOLVENT DMSO  
NS 32  
DS 0  
SWH 8012.820 Hz  
FIDRES 0.244532 Hz  
AQ 2.0447731 sec  
RG 256  
DW 62.400 usec  
DE 6.50 usec  
TE 300.0 K  
D1 2.00000000 sec  
TDO 1

===== CHANNEL f1 =====  
NUC1 1H  
P1 8.40 usec  
PL1 0.00 dB  
SF01 400.1332010 MHz  
SI 16384  
SF 400.1300065 MHz  
WDW EM  
SSB 0  
LB 0.30 Hz  
GB 0  
PC 1.00

SANA/DR, ABDUL HAMEED/SY-I-99/  
ICCBS, U.O.K/  
BB

AVANCE AV - III  
300 MHz, LAB # 116

```
NAME          may11-18
EXPNO         10
PROCNO        1
Date_         20180511
Time          19.48
INSTRUM       Spect
PROBHD        5 mm BBO BB-IH
PULPROG       zgpg
TD            32768
SOLVENT       DMSO
NS            2738
DS            2
SWH           18028.946 Hz
FIDRES        0.350197 Hz
AQ            0.9089159 sec
RG            48.2
DW            27.723 usec
DE            6.50 usec
TE            300.0 K
D1            2.0000000 sec
D11           0.0300000 sec
TDO           18

----- CHANNEL f1 -----
NUC1          13C
P1            12.00 usec
PL1           0.00 dB
PL1W          28.88669395 W
SFO1          75.4764278 MHz

----- CHANNEL f2 -----
CPDPRG2       waltz16
NUC2          1H
PCPD2         1H
PCPD2         80.00 usec
PL2           0.00 dB
PL12          16.12 dB
PL13          17.00 dB
PL2W          13.16229485 W
PL12W         0.32161123 W
PL13W         0.26262212 W
SFO2          300.1315007 MHz
SI            16384
SF            75.4677950 MHz
WDW           EM
SBB           0
IS            1.00 Hz
GB            0
PC            1.00
```

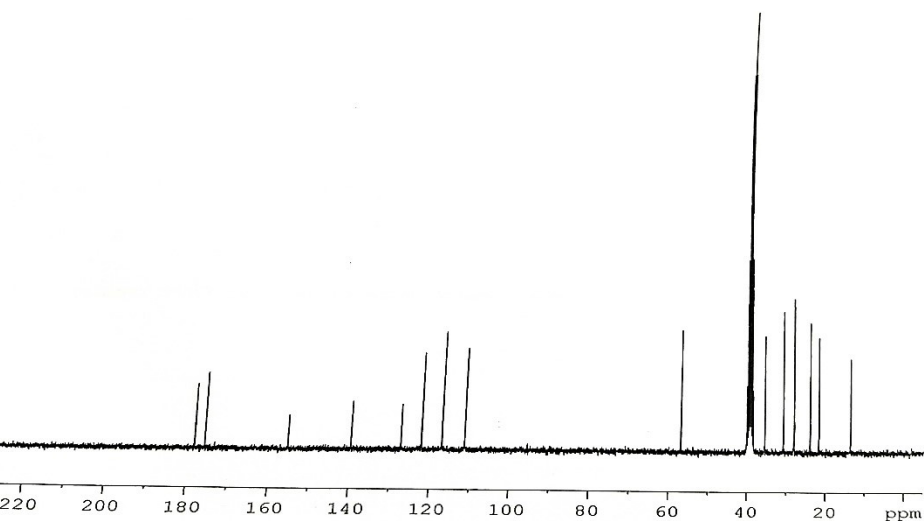



—178.148  
—175.653

—155.321

—139.682

—127.293

—122.197

—117.053

—111.327

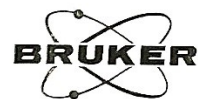

SANA/DR, ABDUL HAMEED/SY-I-99/  
ICCBS, U.O.K/  
BB

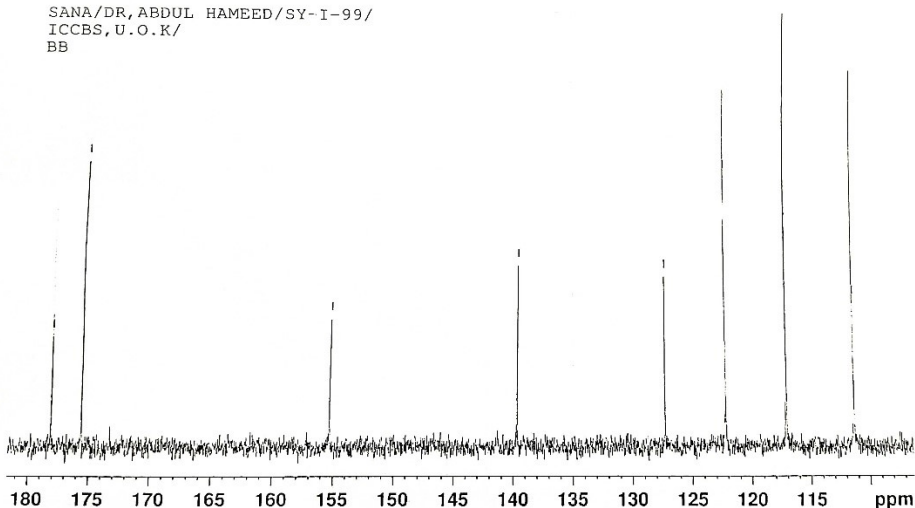

Current Data Parameters  
NAME MAY-11-18 SY-1-99 C13  
EXPNO 10  
PROCNO 1

F2 - Acquisition Parameters  
Date\_ 20160511  
Time 1.48  
INSTRUM spect  
PROBHD 5 mm BBO BB-1H  
PULPROG zgpg  
TD 32768  
SOLVENT DMSO  
NS 2735  
DS 2  
SWH 15026.846 Hz  
FIDRES 0.230177 Hz  
AQ 0.2987050 sec  
RG 48.2  
DW 27.733 usec  
DE 6.50 usec  
TE 300.2 K  
E1 2.00000000 sec  
E11 0.03000000 sec  
TDO 18

===== CHANNEL #1 =====  
NUC1 13C  
P1 12.00 usec  
PL1 0 dB  
PL1W 28.88669295 W  
SFO1 75.4764278 MHz

===== CHANNEL #2 =====  
CPDPRG2 waltz16  
NUC2 1H  
PCPD2 50.00 usec  
PL2 0 dB  
PL12 16.12 dB  
PL13 17.00 dB  
PL2W 12.16228485 W  
PL12W 0.32161123 W  
PL13W 0.26262212 W  
SFO2 300.1315007 MHz

F2 - Processing parameters  
S1 16384  
SF 75.4677850 MHz  
WDW EM  
SSB 0  
LB 1.00 Hz  
GB 0  
PC 1.00

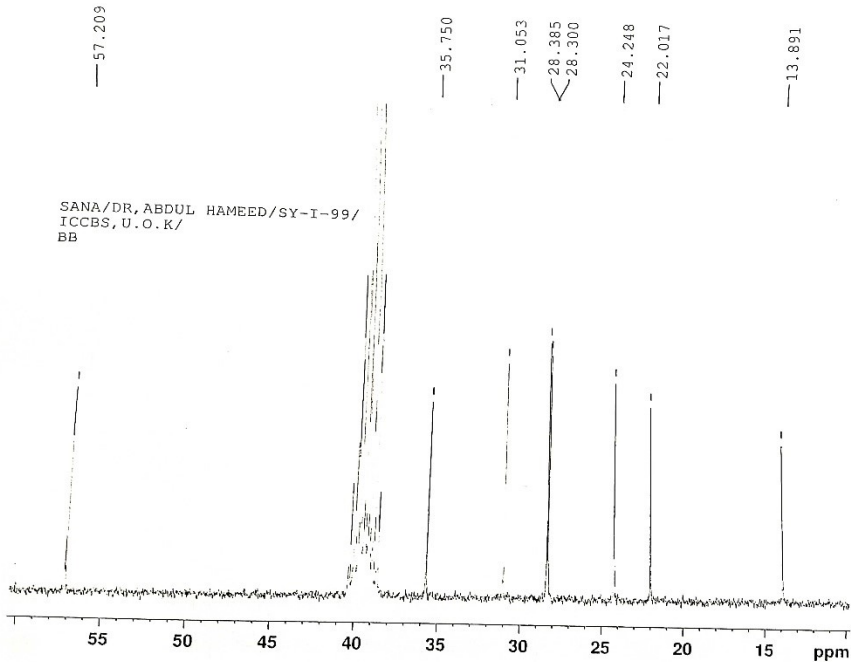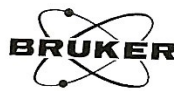

Current Data Parameters  
NAME MAY-11-13 SY-I-99 C13  
EXPNO 10  
PROCNO 1

F2 - Acquisition Parameters  
Date\_ 20180511  
Time\_ 1.48  
INSTRUM spect  
PROBHD 5 mm BBO BB-1H  
PULPROG zgpg  
TD 32768  
TS 0.000  
SOLVENT DMSO  
NS 2738  
DS 2  
SWH 18028.846 Hz  
FIDRES 0.556177 Hz  
AQ 0.9087659 sec  
RG 45.2  
DM 27.733 usec  
DE 6.50 usec  
TE 300.0 K  
U1 2.0000000 sec  
C11 0.0300000 sec  
TD0 38

==== CHANNEL f1 =====  
NUC1 13C  
P1 12.00 usec  
PL1 0 dB  
PL1W 28.8866935 W  
SFO1 75.4764278 MHz

==== CHANNEL f2 =====  
CDEPRG2 waitc16  
NUC2 1H  
PCPD2 80.00 usec  
PL2 0 dB  
PL2 16.12 dB  
PL3 17.00 dB  
PL2W 13.16228485 W  
PL2W 0.32181123 W  
PL3W 0.2626212 W  
SFO2 300.1315007 MHz

F2 - Processing parameters  
S1 16384  
SF 75.4677850 MHz  
EM  
SSB 0  
LB 1.00 Hz  
GB 0  
PC 1.00

Fig-S8: <sup>1</sup>H- and <sup>13</sup>C-NMR Spectra of (3h)

11.864  
11.626

7.541  
7.521  
7.388  
7.368  
7.347

2.464  
2.446  
1.583  
1.566  
1.549  
1.279  
1.269  
0.875  
0.859  
0.841

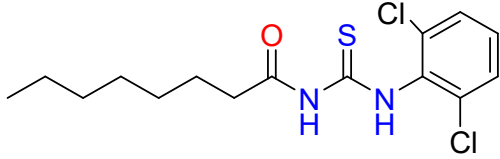

SANA/DR,ABDU  
298K / 1H

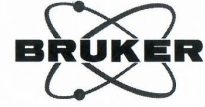

Current Data Parameters  
NAME dec07  
EXPNO 7  
PROCNO 1

F2 - Acquisition Parameters  
Date\_ 20171207  
Time 16.26  
INSTRUM spect  
PROBHD 5 mm SEI 1H-13  
PULPROG zg30  
TD 32768  
SOLVENT DMSO  
NS 64  
DS 0  
SWH 8012.820 Hz  
FIDRES 0.244532 Hz  
AQ 2.0447233 sec  
RG 574.7  
DW 62.400 usec  
DE 17.47 usec  
TE 300.0 K  
D1 2.0000000 sec  
TD0 1

==== CHANNEL f1 =====  
NUC1 1H  
P1 10.63 usec  
PL1 2.00 dB  
SFO1 400.0332002 MHz

F2 - Processing parameters  
SI 32768  
SF 400.0300043 MHz  
WDW EM  
SSB 0  
LB 0.80 Hz  
GB 0  
PC 1.00

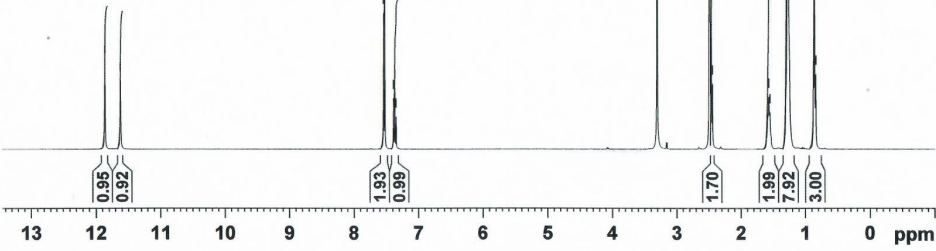

ANA/DR, ABDUL HAMEED/SY-I-957  
 CCBS, U.O.K/  
 B

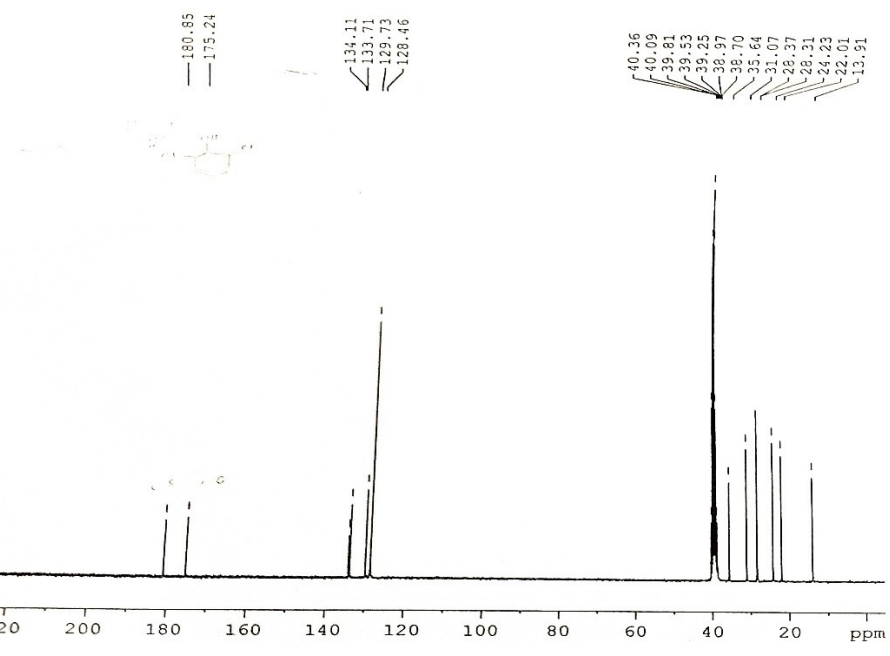

AVANCE AV - III  
 300 MHz, LAB # 116

```

NAME          may10-18
EXPNO         2
PROCNO        1
Date_         20180510
Time         17.15
INSTRUM       Spect
PROBHD        5 mm BBO BB-H1
PULPROG       zgpg30
TD            32768
SOLVENT       DMSO
NS            18432
DS            2
SWH           18028.846 Hz
FIDRES        0.550197 Hz
AQ            0.9088159 sec
RG            45.2
DW            27.733 usec
DE            6.50 usec
TE            300.0 K
D1            2.00000000 sec
D11           0.03000000 sec
TD0           18

----- CHANNEL f1 -----
NUC1          13C
P1            12.00 usec
PL1           0.00 dB
PL1W         28.88669395 W
SFO1         75.4764278 MHz

----- CHANNEL f2 -----
CPDPRG2      waltz16
NUC2          1H
PCPD2        80.00 usec
PL2           0.00 dB
PL12         16.12 dB
PL13         17.00 dB
PL2W         13.16228485 W
PL12W        0.32161123 W
PL13W        0.26262212 W
SFO2         300.1315007 MHz
SI            16384
SF           75.4677850 MHz
WDW           EM
SSB           0
LB            1.00 Hz
GB            0
PC            1.00
  
```

Fig-S9: <sup>1</sup>H- and <sup>13</sup>C-NMR Spectra of (3i)

SANA/DR,  
ICCBS, U.

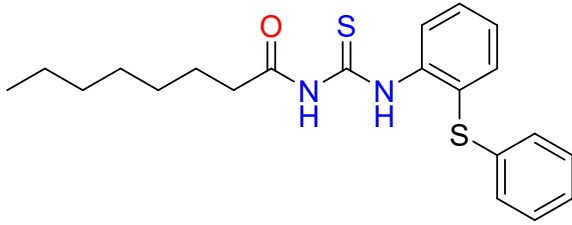

1.529  
1.512  
1.496  
1.243  
0.867  
0.850  
0.833

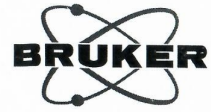

Current Data Parameters  
NAME NOV 1ST 2017  
EXPNO 3  
PROCNO 1

F2 - Acquisition Parameters  
Date\_ 20171101  
Time 16.57  
INSTRUM spect  
PROBHD 5 mm DUL 13C-1  
PULPROG zg30  
TD 32768  
SOLVENT DMSO  
NS 64  
DS 0  
SWH 8012.820 Hz  
FIDRES 0.244532 Hz  
AQ 2.0447233 sec  
RG 322.5  
DW 62.400 usec  
DE 6.50 usec  
TE 300.0 K  
D1 2.00000000 sec  
TDO 1

----- CHANNEL f1 -----  
NUC1 1H  
P1 8.40 usec  
PL1 0 dB  
SFO1 400.1332010 MHz

F2 - Processing parameters  
SI 16384  
SF 400.1300065 MHz  
WDW EM  
SSB 0  
LB 0.30 Hz  
GB 0  
PC 1.00

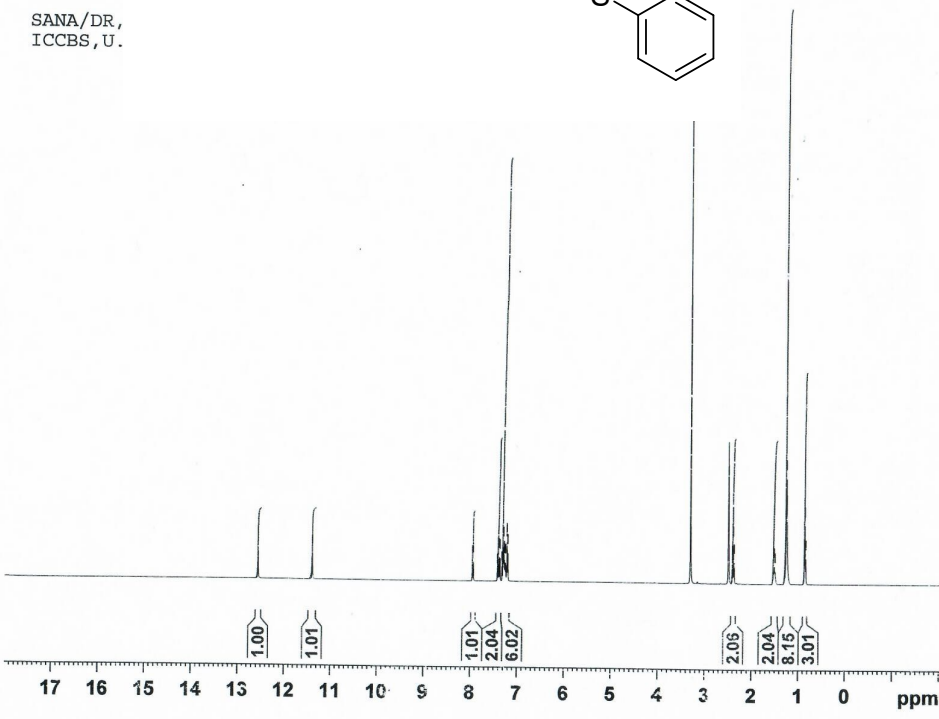

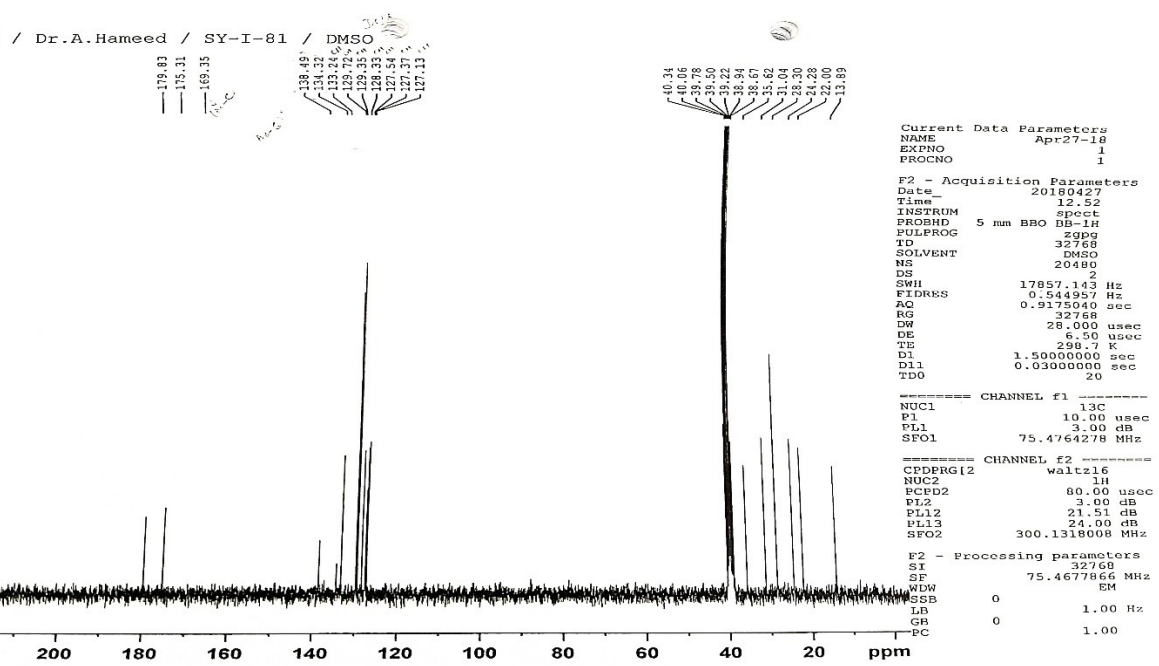

Fig-S10: <sup>1</sup>H- and <sup>13</sup>C-NMR Spectra of (3j)

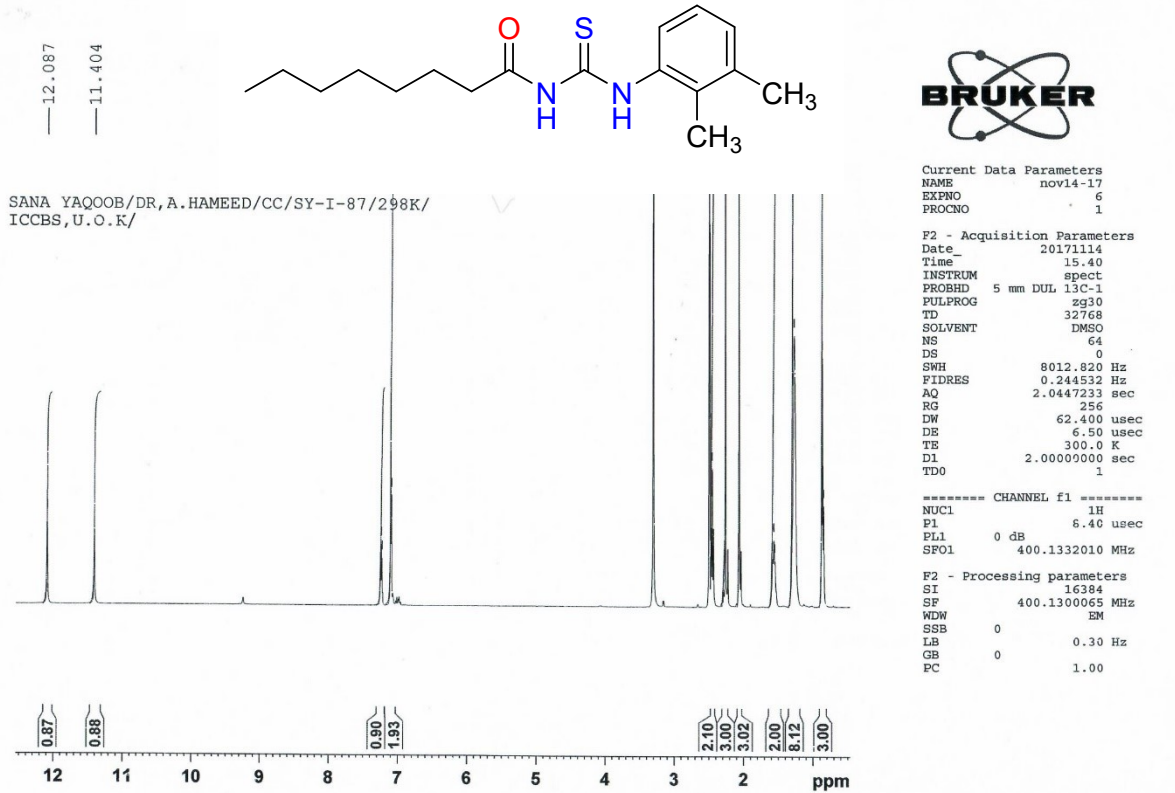

**Fig-S11: <sup>1</sup>H-NMR Spectrum of (3k)**

SANA/DR, ABDUL HAMMED/SY-I-65/  
ICCBS, U.O.K/

AVANCE 400  
LAB NO 117

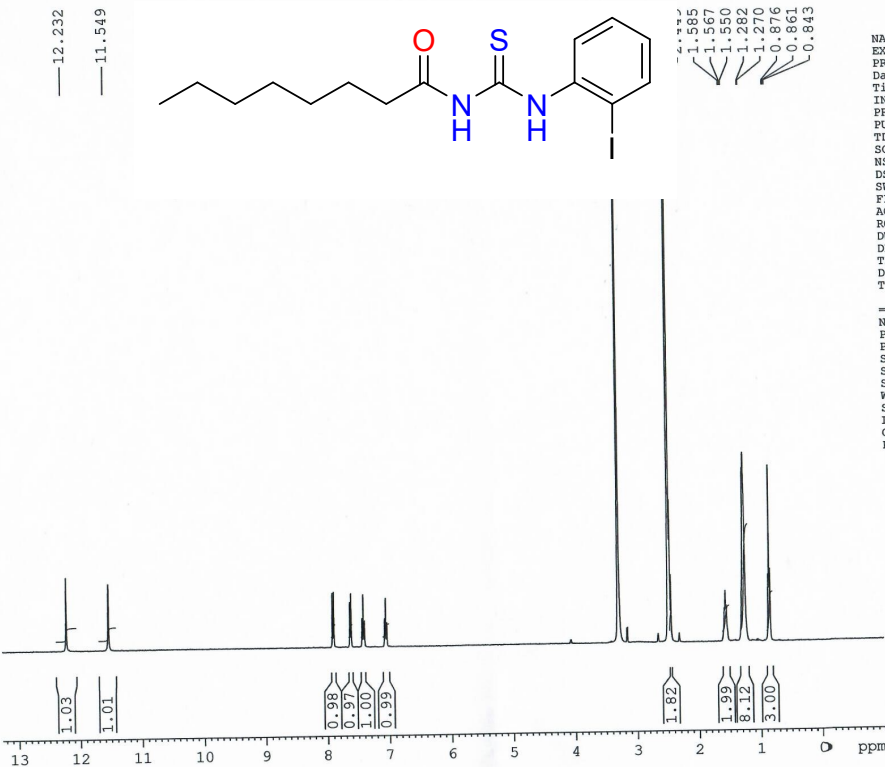

NAME aug24-17  
EXPNO 4  
PROCNO 1  
Date 20170824  
Time 12.29  
INSTRUM spect  
PROBHD 5 mm DUL 13C-1  
PULPROG zg30  
TD 32768  
SOLVENT DMSO  
NS 64  
DS 0  
SWH 8012.820 Hz  
FIDRES 0.244532 Hz  
AQ 2.0447731 sec  
RG 512  
DW 62.400 usec  
DE 6.50 usec  
TE 300.0 K  
DI 2.00000000 sec  
TDO 1

===== CHANNEL f1 =====  
NUC1 1H  
P1 8.40 usec  
PL1 0.00 dB  
SFO1 400.1332010 MHz  
SI 16384  
SF 400.1300065 MHz  
WDW EM  
SSB 0  
LB 0.30 Hz  
GB 0  
PC 1.00



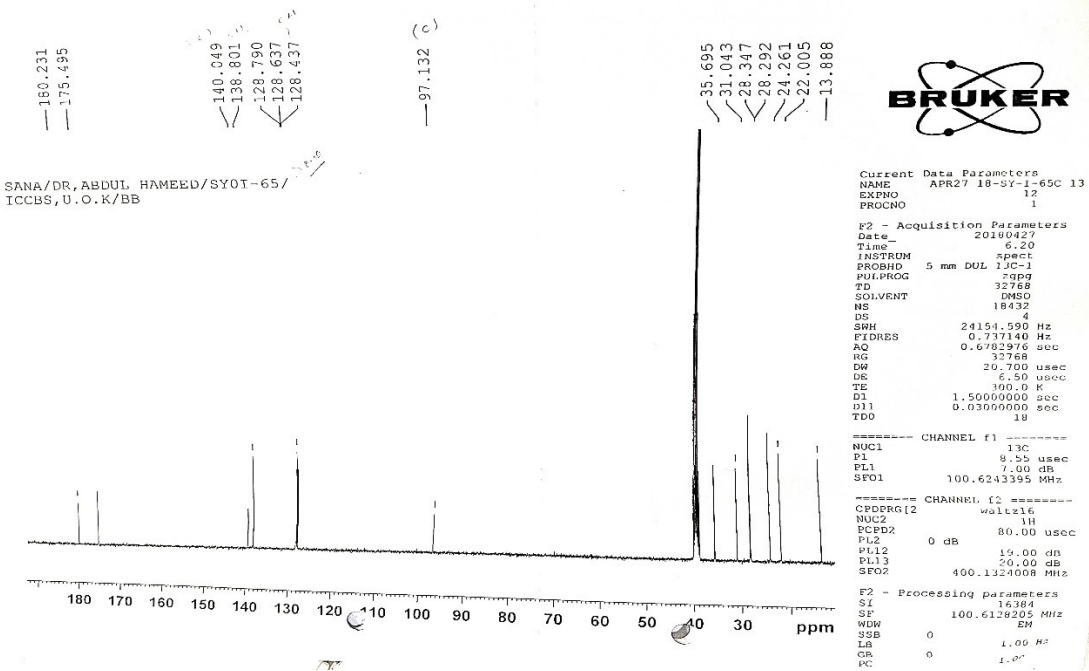

Fig-S12: <sup>1</sup>H- and <sup>13</sup>C-NMR Spectra of (31)

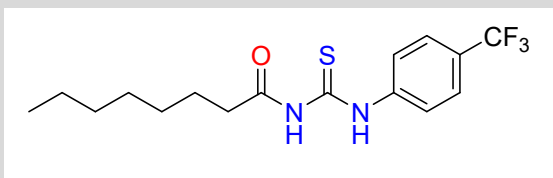

*Fig-S 13: <sup>1</sup>H-NMR Spectrum of (3m)*

SANA/DR, ABDUL HAJ  
ICCBS, U.O. K/1H

12.736

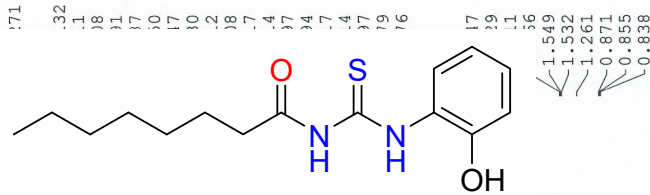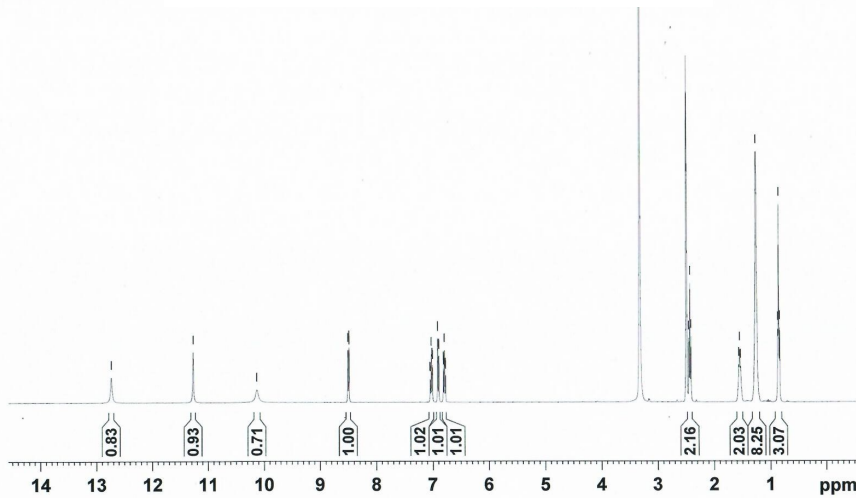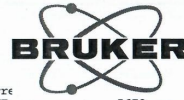

Curf 5678  
NAME 1  
EXPRO 1  
PROCNO 1

F2 - Acquisition Parameters  
Date 20180314  
Time 4.07  
INSTRUM spect  
PROBHD 5 mm DUL 13C-1  
PULPROG zg30  
TD 32768  
SOLVENT DMSO  
NS 32  
DS 0  
SWH 8012.820 Hz  
FIDRES 0.244532 Hz  
AQ 2.0447233 sec  
RG 228.1  
DW 62.400 usec  
DE 6.50 usec  
TE 300.0 K  
D1 2.00000000 sec  
TD0 1

===== CHANNEL f1 =====  
NUC1 1H  
P1 8.40 usec  
PL1 0 dB  
SFO1 400.1332010 MHz

F2 - Processing parameters  
SI 16384  
SF 400.1300065 MHz  
WDW EM  
SSB 0  
LB 0.30 Hz  
GB 0  
FC 1.00

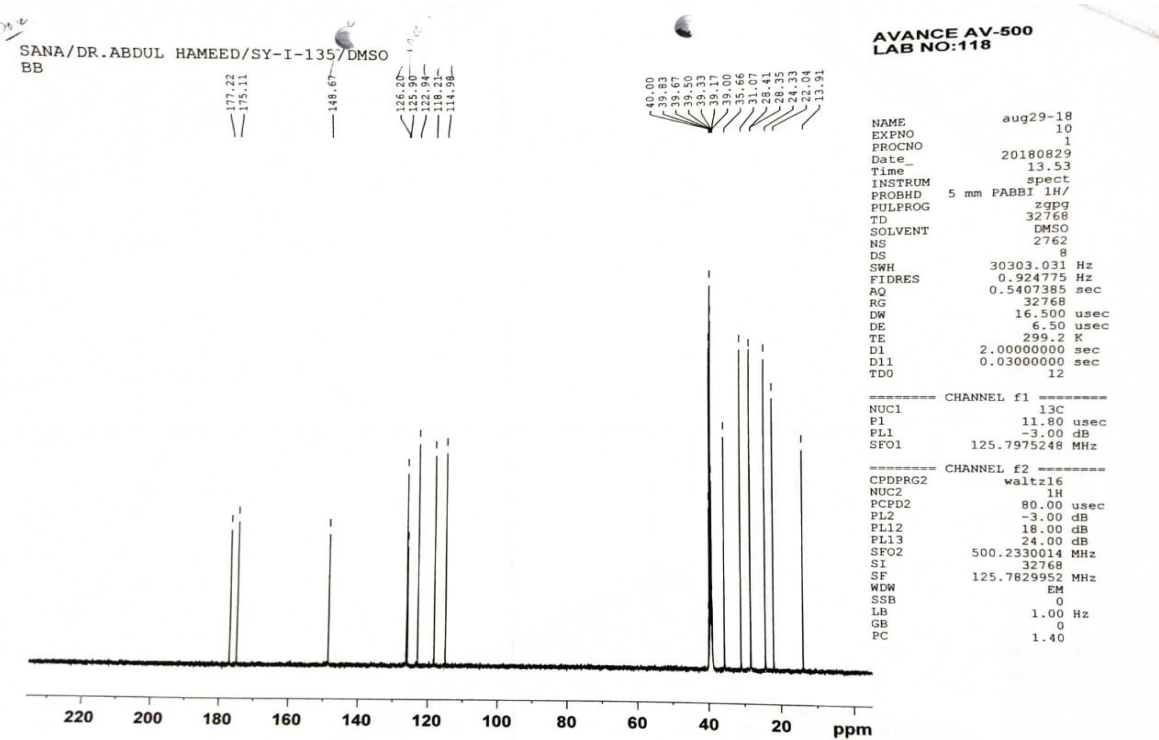

Fig-S14:  $^1\text{H}$ - and  $^{13}\text{C}$ -NMR Spectra of (3n)

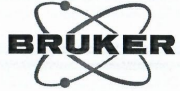

Current Data Parameters  
NAME 5678  
EXPNO 2  
PROCNO 1

F2 - Acquisition Parameters  
Date\_ 20180314  
Time 4.15  
INSTRUM spect  
PROBHD 5 mm DUL 13C-1  
PULPROG zg30  
TD 32768  
SOLVENT DMSO  
NS 64  
DS 0  
SWH 8012.820 Hz  
FIDRES 0.244532 Hz  
AQ 2.0447233 sec  
RG 322.5  
DW 62.400 usec  
DE 6.50 usec  
TE 300.0 K  
D1 2.0000000 sec  
TDO 1

==== CHANNEL f1 =====  
NUC1 1H  
P1 8.40 usec  
PL1 0 dB  
SFOL 400.1322010 MHz

F2 - Processing parameters  
SI 16384  
SF 400.130065 MHz  
WDW EM  
SSB 0  
LB 0.30 Hz  
GB 0  
PC 1.00

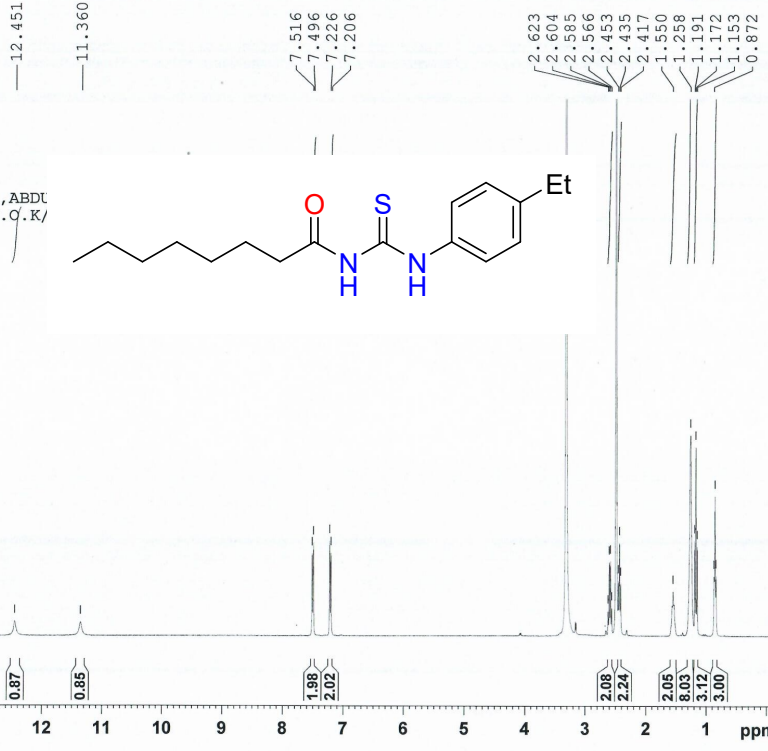

SANA/DR, ABDU  
ICCBS, U.C.K/

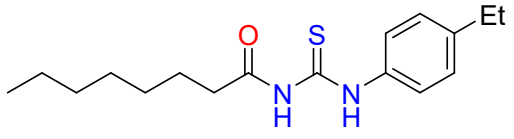

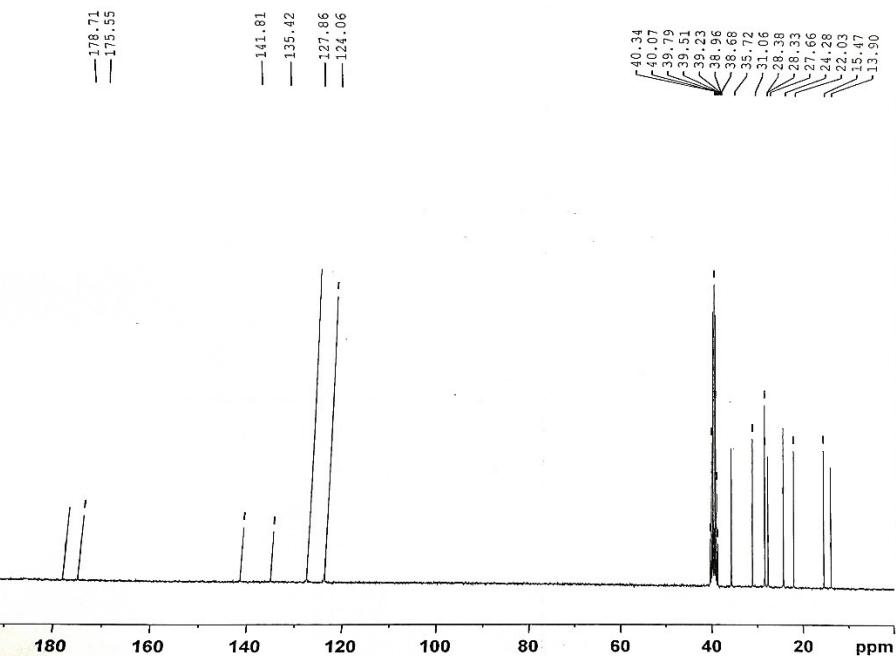

AVANCE NEO  
300 MHz  
Lab # 108

Current Data Parameters  
 NAME Aug28-18  
 EXPNO 1  
 PROCNO 1

F2 - Acquisition Parameters  
 Date\_ 20180829  
 Time\_ 2.18 h  
 INSTRUM Avance Neo 300  
 PROBHD Z8264\_0948 1H  
 PULPROG zgpg  
 TD 32768  
 SOLVENT DMSO  
 NS 16384  
 DS 8  
 SWH 17857.143 Hz  
 FIDRES 1.089913 Hz  
 AQ 0.9175040 sec  
 RG 4.6875  
 DW 28.000 usec  
 DE 12.00 usec  
 TE 300.0 K  
 D1 1.50000000 sec  
 D11 0.03000000 sec  
 TDO 16  
 SFO1 75.4764278 MHz  
 NUC1 13C  
 P1 10.00 usec  
 PLW1 53.07400131 W  
 SFO2 500.1312005 MHz  
 NUC2 1H  
 CPDPRG2 waltz65  
 FCPDZ 90.00 usec  
 PLW2 8.72920036 W  
 PLW12 0.24247999 W  
 PLW13 0.12196000 W

F2 - Processing parameters  
 SI 16384  
 SF 75.4677860 MHz  
 WDW EM  
 SSB 0  
 LB 1.00 Hz  
 GB 0  
 PC 1.20

Fig-S15: <sup>1</sup>H- and <sup>13</sup>C-NMR Spectra of (30)

—12.491  
 —11.531  
 10.130

SANA/DR, ABDUL HAM  
 ICCBS, U.O.K/

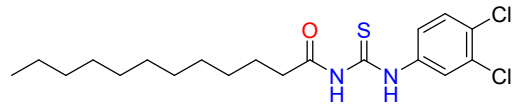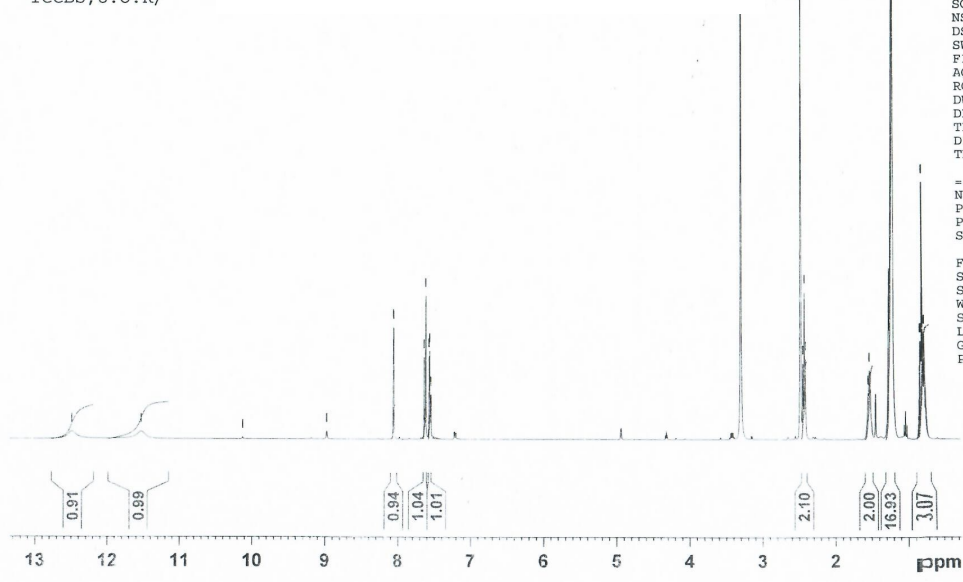

2.455  
 2.437  
 2.419  
 1.560  
 1.543  
 1.527  
 1.232  
 0.855

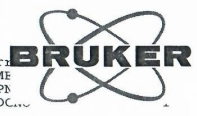

Cur  
 NAME  
 EXPR  
 PROC...

F2 - Acquisition Parameters  
 Date\_ 20170925  
 Time\_ 12.32  
 INSTRUM spect  
 PROBHD 5 mm DUL 13C-1  
 PULPROG zg30  
 TD 32768  
 SOLVENT DMSO  
 NS 128  
 DS 0  
 SWH 8012.820 Hz  
 FIDRES 0.244532 Hz  
 AQ 2.0447233 sec  
 RG 256  
 DW 62.400 usec  
 DE 6.50 usec  
 TE 300.0 K  
 D1 2.00000000 sec  
 TD0 1

===== CHANNEL f1 =====  
 NUC1 1H  
 P1 8.40 usec  
 PL1 0 dB  
 SF01 400.1332010 MHz

F2 - Processing parameters  
 SI 16384  
 SF 400.1300065 MHz  
 WDW EM  
 SSB 0  
 LB 0.30 Hz  
 GB 0  
 FC 1.00

AVANCE NEO  
300 MHz  
Lab # 108

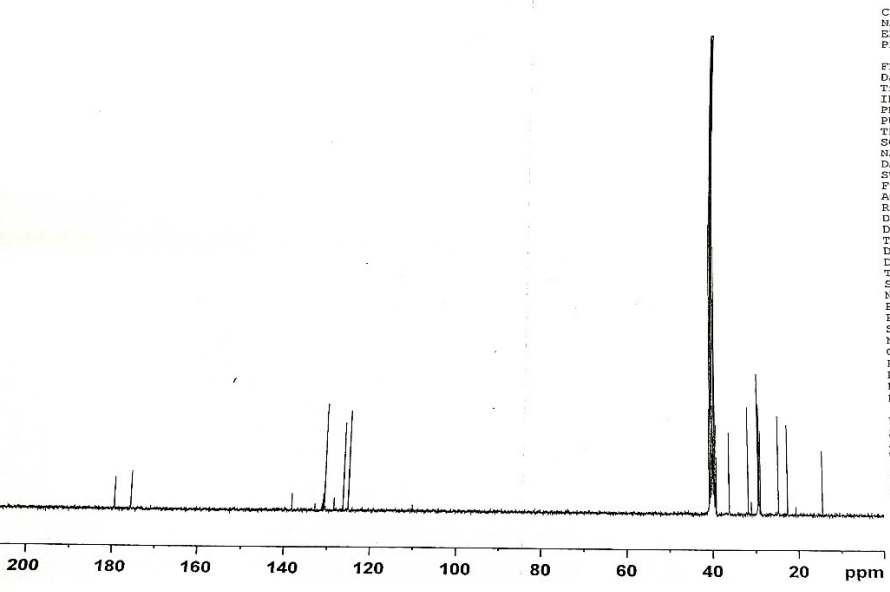

Current Data Parameters  
NAME July24-18  
EXPNO 1  
PROCNO 1

F2 - Acquisition Parameters  
Date\_ 20180725  
Time 12.52 h  
INSTRUM Avance Neo 300  
PROBHD Z8284\_0948 (PH  
PULPROG zgpg  
TD 32768  
SOLVENT DMSO  
NS 30720  
DS 8  
SWH 17857.143 Hz  
FIDRES 1.089911 Hz  
AQ 0.9175040 sec  
RG 4.6875  
DW 28.000 usec  
DE 12.00 usec  
TE 300.0 K  
D1 1.5000000 sec  
D11 0.0300000 sec  
TDO 30  
SFO1 75.4764278 MHz  
NUC1 13C  
P1 10.00 usec  
PLW1 53.07400131 W  
SFO2 300.1312005 MHz  
NUC2 1H  
CPDPRG[2] waltz65  
PCPDZ 90.00 usec  
PLW2 8.72920036 W  
PLW12 0.24247999 W  
PLW13 0.12196000 W

F2 - Processing parameters  
SI 16384  
SF 75.4677547 MHz  
WDW EM  
SSB 0  
LB 1.00 Hz  
GB 0  
PC 1.20

Fig-S16: <sup>1</sup>H- and <sup>13</sup>C-NMR Spectra of (3p)



SANA/DR, ABDUL  
 ICCBS, U.O.K/1H

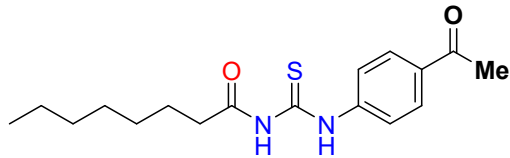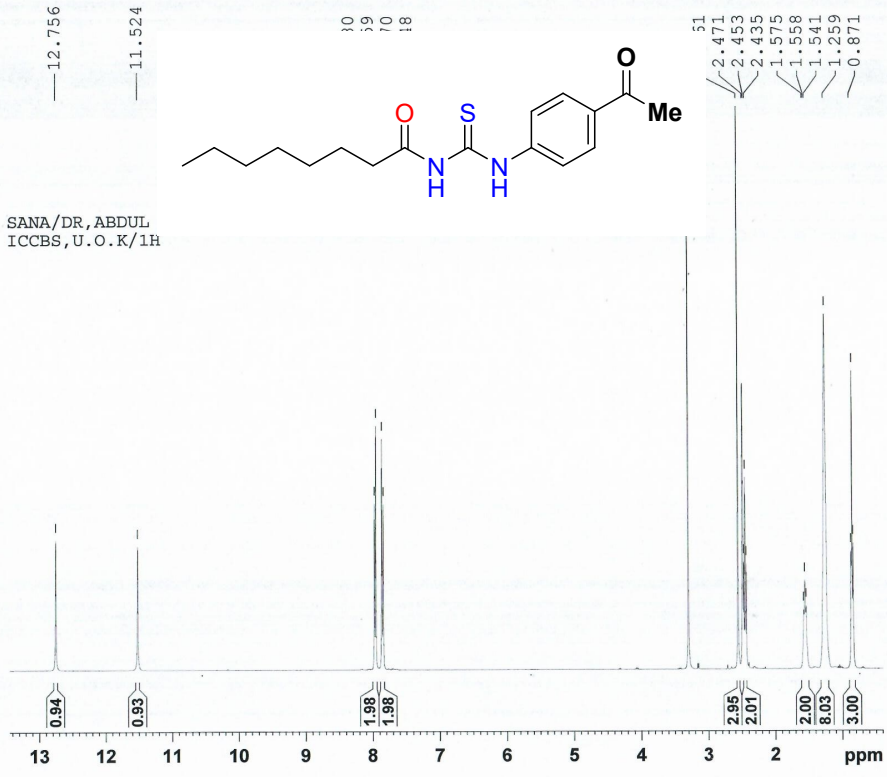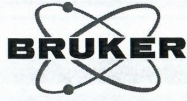

Current Data Parameters  
 NAME 5678  
 EXPNO 7  
 PROCNO 1

F2 - Acquisition Parameters  
 Date\_ 20180309  
 Time 3.48  
 INSTRUM spect  
 PROBHD 5 mm DUL 13C-1  
 PULPROG zg30  
 TD 32768  
 SOLVENT DMSO  
 NS 32  
 DS 0  
 SWH 8012.820 Hz  
 FIDRES 0.244532 Hz  
 AQ 2.0447233 sec  
 RG 181  
 DW 62.400 usec  
 DE 6.50 usec  
 TE 300.0 K  
 D1 2.00000000 sec  
 TDO 1

===== CHANNEL f1 =====  
 NUC1 1H  
 P1 8.40 usec  
 PL1 0 dB  
 SFO1 400.1332010 MHz

F2 - Processing parameters  
 SI 16384  
 SF 400.1300065 MHz  
 WDW EM  
 SSB 0  
 LB 0.30 Hz  
 GB 0  
 PC 1.00

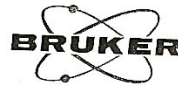

SANA/DR.ABDUL HAMEED/SY-I-131/DMSO  
BB

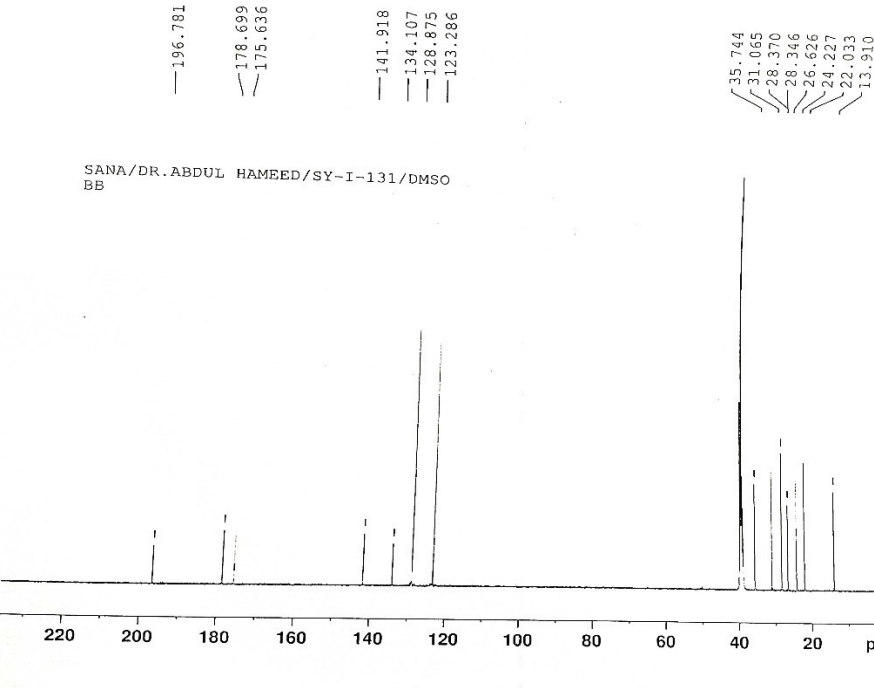

Current Data Parameters  
NAME SY1-131  
EXPNO 10  
PROCNO 1

F2 - Acquisition Parameters  
Date\_ 20180830  
Time 7.22  
INSTRUM spect  
PROBHD 5 mm FABBI 1H/  
PULPROG zgpg  
TD 32768  
SOLVENT DMSO  
NS 18432  
DS 8  
SWH 30303.031 Hz  
FIDRES 0.924775 Hz  
AQ 0.506700 sec  
RG 32768  
DW 16.500 usec  
DE 6.50 usec  
IE 299.4 K  
D1 2.00000000 sec  
D11 0.03000000 sec  
TDD 18

----- CHANNEL f1 -----  
NUC1 13C  
P1 11.80 usec  
PL1 -3.00 dB  
SFO1 125.7975248 MHz

----- CHANNEL f2 -----  
CPDPRG2 waltz16  
NUC2 1H  
PCPD2 80.00 usec  
PL2 -3.00 dB  
PL12 18.00 dB  
PL13 24.00 dB  
SFO2 500.2350014 MHz

F2 - Processing parameters  
SI 32768  
SF 125.7829954 MHz  
WDW EM  
SSB 0  
LB 1.00 Hz  
GB 0  
PC 1.40

Fig-S17: <sup>1</sup>H- and <sup>13</sup>C-NMR Spectra of (3q)
